# Supplementary material
Source: PubMed Central journal article supplement (PMC5498313)
Supplement: supp_5.2.E315_2016-0139-2-at.pdf [file supp_5.2.E315_2016-0139-2-at.pdf]

Appendix 2 (as supplied by the authors): CANHEART Primary Prevention Performance Indicator Definitions

| ID                        | Primary Prevention Indicator Topic Area                         | Numerator                                                                                                                                                                                            | Denominator                                                                                  | Exclusions                                                         | Preferred Data Source                                                                        | Alternate Data Source(s) | Relevant Clinical Guideline                                                                                                           |
|---------------------------|-----------------------------------------------------------------|------------------------------------------------------------------------------------------------------------------------------------------------------------------------------------------------------|----------------------------------------------------------------------------------------------|--------------------------------------------------------------------|----------------------------------------------------------------------------------------------|--------------------------|---------------------------------------------------------------------------------------------------------------------------------------|
| <b>Smoking (N=2)</b>      |                                                                 |                                                                                                                                                                                                      |                                                                                              |                                                                    |                                                                                              |                          |                                                                                                                                       |
| SMK1                      | Prevalence of smoking                                           | Number of individuals in the denominator who self-reported being/were identified as a current smoker, either daily or occasionally                                                                   | Number of individuals/primary healthcare patients, 20 years of age and older                 | None                                                               | Survey (e.g., Canadian Community Health Survey (CCHS))                                       | EMR                      | C-CHANGE (Tobe et al., 2011)                                                                                                          |
| SMK2                      | Percentage of smokers who received smoking cessation counseling | Number of individuals in the denominator who received smoking cessation counseling                                                                                                                   | Number of individuals/primary healthcare patients, age 20 and older, who are current smokers | None                                                               | Administrative Databases (Physician Services, e.g., Ontario Health Insurance Plan (OHIP))    | Survey (e.g., CCHS)      | C-CHANGE (Tobe et al., 2011)                                                                                                          |
| <b>Obesity (N=2)</b>      |                                                                 |                                                                                                                                                                                                      |                                                                                              |                                                                    |                                                                                              |                          |                                                                                                                                       |
| WHT1                      | Prevalence of obesity                                           | Number of individuals in the denominator who had a measured or self-reported body mass index $\geq 30$ kg/m <sup>2</sup>                                                                             | Number of individuals/primary healthcare patients age 20 and older                           | Individual was pregnant at the time of body-mass index measurement | Survey (e.g., CCHS)                                                                          | EMR                      | 2006 Canadian clinical practice guidelines on the management and prevention of obesity in adults and children (Lau et al., 2007 CMAJ) |
| WHT2                      | Percentage of patients with height and weight measured          | Number of individuals in denominator who had their height and weight measured by a healthcare professional                                                                                           | Number of individuals/primary healthcare patients age 20 and older                           | None                                                               | EMR                                                                                          | N/A                      | 2006 Canadian clinical practice guidelines on the management and prevention of obesity in adults and children (Lau et al., 2007 CMAJ) |
| <b>Hypertension (N=4)</b> |                                                                 |                                                                                                                                                                                                      |                                                                                              |                                                                    |                                                                                              |                          |                                                                                                                                       |
| HTN1                      | Prevalence of hypertension                                      | Number of patients in the denominator who have a diagnosis of hypertension OR elevated blood pressure ( $\geq 140$ mmHg systolic or $\geq 90$ mmHg diastolic) OR who self-report having hypertension | Number of individuals/primary healthcare patients 20 years of age and older                  | None                                                               | Administrative Databases (Validated Disease Algorithms, e.g., Ontario Hypertension Database) | EMR, Survey (e.g., CCHS) | CHEP 2016 Guidelines (Leung et al., CJC)                                                                                              |

| ID    | Primary Prevention Indicator Topic Area                                                                     | Numerator                                                                                                              | Denominator                                                                                                                        | Exclusions                                                                                                                                    | Preferred Data Source                                                                                                                                            | Alternate Data Source(s) | Relevant Clinical Guideline              |
|-------|-------------------------------------------------------------------------------------------------------------|------------------------------------------------------------------------------------------------------------------------|------------------------------------------------------------------------------------------------------------------------------------|-----------------------------------------------------------------------------------------------------------------------------------------------|------------------------------------------------------------------------------------------------------------------------------------------------------------------|--------------------------|------------------------------------------|
| HTN2  | Percentage of patients who had their blood pressure measured                                                | Number of patients in the denominator who have had their blood pressure measured by a healthcare professional          | Number of primary healthcare patients age 20 years of age and older                                                                | None                                                                                                                                          | EMR                                                                                                                                                              | Survey (e.g., CCHS)      | CHEP 2016 Guidelines (Leung et al., CJC) |
| HTN3A | Percentage of patients with hypertension taking $\geq 1$ anti-hypertension medication                       | Number of patients in the denominator who were prescribed/self-report taking at least one anti-hypertension medication | Number of primary healthcare patients with hypertension, 20 years of age and older                                                 | None                                                                                                                                          | Administrative Databases (Prescription Medication Claims, e.g., Ontario Drug Benefit Database, Validated Disease Algorithms, e.g. Ontario Hypertension Database) | EMR, Survey (e.g., CCHS) | CHEP 2016 Guidelines (Leung et al., CJC) |
| HTN3B | Mean number of antihypertensive medications taken among patients with treated hypertension                  | Mean number of antihypertensive medications taken among patients in the denominator                                    | Number of primary healthcare patients with hypertension, 20 years of age and older taking at least one antihypertensive medication | None                                                                                                                                          | Administrative Databases (Medication Claims, e.g., Ontario Drug Benefit Database, Validated Disease Algorithms, e.g. Ontario Hypertension Database)              | EMR                      | CHEP 2016 Guidelines (Leung et al., CJC) |
| HTN4A | Measured blood pressure control (<140mmHg systolic and <90 mmHg diastolic) among patients with hypertension | Number of patients in the denominator who had a blood pressure measure <140mmHg systolic and <90mmHg diastolic         | Number of primary healthcare patients with hypertension, 20 years of age and older                                                 | Patients with a diagnosis of diabetes (these patients should be treated to attain blood pressures of <130mmHg systolic and <80mmHg diastolic) | EMR                                                                                                                                                              | N/A                      | CHEP 2016 Guidelines (Leung et al., CJC) |

| ID                    | Primary Prevention Indicator Topic Area                                                                                    | Numerator                                                                                                                                                                                                                | Denominator                                                                               | Exclusions                                     | Preferred Data Source                                                                                                                    | Alternate Data Source(s) | Relevant Clinical Guideline                                                                     |
|-----------------------|----------------------------------------------------------------------------------------------------------------------------|--------------------------------------------------------------------------------------------------------------------------------------------------------------------------------------------------------------------------|-------------------------------------------------------------------------------------------|------------------------------------------------|------------------------------------------------------------------------------------------------------------------------------------------|--------------------------|-------------------------------------------------------------------------------------------------|
| HTN4B                 | Emergency Department visit rate for hypertension among patients with hypertension                                          | Number of Emergency Department visits for hypertension by patients in denominator                                                                                                                                        | Number of primary healthcare patients with hypertension, 20 years of age and older        | None                                           | Administrative Databases (Emergency Medical Services, e.g., NACRS, Validated Algorithms, e.g. Ontario Hypertension Database)             | N/A                      | CHEP 2016 Guidelines (Leung et al., CJC) Rationale: Surrogate measure of blood pressure control |
| <b>Diabetes (N=6)</b> |                                                                                                                            |                                                                                                                                                                                                                          |                                                                                           |                                                |                                                                                                                                          |                          |                                                                                                 |
| DIA1                  | Prevalence of diabetes                                                                                                     | Number of patients in the denominator who have a diagnosis of diabetes (Type I or Type II) based on a validated administrative data algorithm, recorded primary healthcare provider diagnosis in the EMR, or self-report | Number of primary healthcare patients age 20 and older                                    | None                                           | Administrative Databases (Validated Algorithms, e.g. Ontario Diabetes Database)                                                          | EMR, Survey (e.g., CCHS) | Canadian Diabetes Association Clinical Practice Guidelines (Cheng et al., 2013 Can J Diabetes)  |
| DIA2                  | Percentage of patients age 40 and older who had a full fasting blood glucose or HbA1c screening test in the past 36 months | Number of patients in the denominator who have had a fasting blood glucose screening or HbA1c screening within the past 36 months                                                                                        | Number of primary healthcare patients age 40 and older                                    | Patients with a previous diagnosis of diabetes | Administrative Databases (Physician Claims, e.g., OHIP, Validated Algorithms, e.g. Ontario Diabetes Database-for exclusion criteria)     | EMR, Survey (e.g., CCHS) | Canadian Diabetes Association Clinical Practice Guidelines (Cheng et al., 2013 Can J Diabetes)  |
| DIA3                  | Percentage of patients with diabetes taking anti-diabetic medications                                                      | Number of patients in the denominator who are taking anti-diabetic medications (oral agents or insulin)                                                                                                                  | Number of primary healthcare patients with diabetes (type I or type II), age 20 and older | None                                           | Administrative Databases (Medication Claims, e.g., Ontario Drug Benefit Database, Validated Algorithms, e.g., Ontario Diabetes Database) | Survey (e.g., CCHS)      | Canadian Diabetes Association Clinical Practice Guidelines (Cheng et al., 2013 Can J Diabetes)  |

| ID                        | Primary Prevention Indicator Topic Area                                                                                                                | Numerator                                                                                                                            | Denominator                                                                               | Exclusions                                                                                                                                                                              | Preferred Data Source                                                                                                                          | Alternate Data Source(s) | Relevant Clinical Guideline                                                                    |
|---------------------------|--------------------------------------------------------------------------------------------------------------------------------------------------------|--------------------------------------------------------------------------------------------------------------------------------------|-------------------------------------------------------------------------------------------|-----------------------------------------------------------------------------------------------------------------------------------------------------------------------------------------|------------------------------------------------------------------------------------------------------------------------------------------------|--------------------------|------------------------------------------------------------------------------------------------|
| <b>DIA4</b>               | Percentage of patients with diabetes age 55 and older taking angiotensin-converting enzyme (ACE) inhibitors or angiotensin II receptor blockers (ARBs) | Number of patients in the denominator who are taking ACE-inhibitors or ARBs                                                          | Number of primary healthcare patients with diabetes (Type I or Type II), age 55 and older | None                                                                                                                                                                                    | Administrative Databases (Medication Claims, e.g., Ontario Drug Benefit Database, Validated Algorithms, e.g., Ontario Diabetes Database)       |                          | Canadian Diabetes Association Clinical Practice Guidelines (Cheng et al., 2013 Can J Diabetes) |
| <b>DIA5</b>               | Percentage of patients with diabetes age 40 and older taking statin medication                                                                         | Number of patients in the denominator who were prescribed statins                                                                    | Number of primary healthcare patients with diabetes (Type I or Type II), age 40 and older | None                                                                                                                                                                                    | Administrative Databases (Medication Claims, e.g. Ontario Drug Benefit, Validated Algorithms, e.g. Ontario Diabetes Databases)                 | EMR                      | Canadian Diabetes Association Clinical Practice Guidelines (Cheng et al., 2013 Can J Diabetes) |
| <b>DIA6</b>               | Percentage of patients with diabetes with hemoglobin A1c controlled (HbA1c $\leq 7\%$ )                                                                | Number of patients in the denominator whose most recent HbA1c measurement (within the past 12 months) was $\leq 7\%$                 | Number of primary healthcare patients age 20 and older with diabetes (Type I or Type II)  | Diabetics with no HbA1c measurement, or those with limited life expectancy and high levels of functional dependency (for whom less stringent HbA1c targets of 7.1% to 8.5% may be used) | Administrative Databases (Medication Claims, e.g. Ontario Drug Benefit, Validated Algorithms, e.g. Ontario Diabetes Database, Laboratory Data) | EMR                      | Canadian Diabetes Association Clinical Practice Guidelines (Cheng et al., 2013 Can J Diabetes) |
| <b>Dyslipidemia (N=4)</b> |                                                                                                                                                        |                                                                                                                                      |                                                                                           |                                                                                                                                                                                         |                                                                                                                                                |                          |                                                                                                |
| <b>LIP1</b>               | Prevalence of high lipid levels (e.g., total cholesterol $\geq 5.2$ mmol/L)                                                                            | Number of patients in the denominator who had a blood test for total cholesterol where total cholesterol value was $\geq 5.2$ mmol/L | Number of primary healthcare patients age 20 and older                                    | None                                                                                                                                                                                    | Administrative Data (Laboratory Databases)                                                                                                     | EMR                      | Canadian Cardiovascular Society 2012 Dyslipidemia Guidelines (Anderson et al., 2013 CJC)       |

| ID                               | Primary Prevention Indicator Topic Area                                                                                        | Numerator                                                                                                                       | Denominator                                                                                                                                                                                             | Exclusions | Preferred Data Source                                                                                                                                         | Alternate Data Source(s) | Relevant Clinical Guideline                                                                                                                                                              |
|----------------------------------|--------------------------------------------------------------------------------------------------------------------------------|---------------------------------------------------------------------------------------------------------------------------------|---------------------------------------------------------------------------------------------------------------------------------------------------------------------------------------------------------|------------|---------------------------------------------------------------------------------------------------------------------------------------------------------------|--------------------------|------------------------------------------------------------------------------------------------------------------------------------------------------------------------------------------|
| LIP2                             | Percentage of men age 40 and older and women age 50 and older who have had a full lipid profile in the past 5 years            | Number of patients in the denominator who had a full fasting lipid profile measured within the past 5 years                     | Number of primary healthcare patients age 40 and older (men) and 50 and older (women)                                                                                                                   | None       | Administrative Databases (Physician Services, e.g., Ontario Health Insurance Plan (OHIP))                                                                     | N/A                      | Canadian Cardiovascular Society 2012 Dyslipidemia Guidelines (Anderson et al., 2013 CJC)                                                                                                 |
| LIP3                             | Percentage of high-risk primary prevention patients taking statins (e.g. LDL >5.0 mmol/L, high Framingham risk score, age ≥65) | Number of patients in the denominator who were prescribed/self-report taking statins                                            | Number of high risk (defined by Framingham risk score ≥ 20%, patients with LDL >5.0 mmol/L, diabetic patients, or other definition of cardiovascular risk) primary healthcare patients age 20 and older | None       | Administrative Databases (Medication Claims, e.g., Ontario Drug Benefit Database, Validated Algorithms, e.g. Ontario Diabetes Database, Laboratory Databases) | EMR, Survey (e.g., CCHS) | Canadian Cardiovascular Society 2012 Dyslipidemia Guidelines (Anderson et al., 2013 CJC); Canadian Diabetes Association Clinical Practice Guidelines (Cheng et al., 2013 Can J Diabetes) |
| LIP4                             | Percentage of patients taking statins who have their lipid levels controlled (LDL-C ≤2mmol/L)                                  | Number of patients in the denominator with most recent blood test showing LDL-C ≤2 mmol/L                                       | Number of primary healthcare patients age 20 and older taking statins                                                                                                                                   | None       | Administrative Databases (Medication Claims, e.g., Ontario Drug Benefit Database, Laboratory Databases)                                                       | EMR                      | Canadian Cardiovascular Society 2012 Dyslipidemia Guidelines (Anderson et al., 2013 CJC)                                                                                                 |
| <b>Atrial Fibrillation (N=3)</b> |                                                                                                                                |                                                                                                                                 |                                                                                                                                                                                                         |            |                                                                                                                                                               |                          |                                                                                                                                                                                          |
| AFIB1                            | Prevalence of atrial fibrillation                                                                                              | Number of patients in the denominator with diagnosis of atrial fibrillation/hospitalization or ED visit for atrial fibrillation | Number of primary healthcare patients age 20 and older                                                                                                                                                  | None       | Administrative Databases (Hospitalization, e.g., CIHI-DAD, Physician Claims, e.g., OHIP, Emergency Medicine, e.g., NACRS)                                     | EMR                      | Canadian Stroke Best Practice Recommendations, 2012-2013 (Lindsay et al., Canadian Heart and Stroke Foundation)                                                                          |

| ID                                  | Primary Prevention Indicator Topic Area                                                                          | Numerator                                                                              | Denominator                                                                                                                   | Exclusions | Preferred Data Source                                                                                                                                                                                   | Alternate Data Source(s) | Relevant Clinical Guideline                                                                                     |
|-------------------------------------|------------------------------------------------------------------------------------------------------------------|----------------------------------------------------------------------------------------|-------------------------------------------------------------------------------------------------------------------------------|------------|---------------------------------------------------------------------------------------------------------------------------------------------------------------------------------------------------------|--------------------------|-----------------------------------------------------------------------------------------------------------------|
| AFIB2                               | Percentage of patients with atrial fibrillation on anticoagulant therapy (warfarin or direct oral anticoagulant) | Number of patients in the denominator prescribed Warfarin or direct oral anticoagulant | Number of primary healthcare patients age 20 and older with atrial fibrillation                                               | None       | Administrative Databases (Hospitalization, e.g., CIHI-DAD, Physician Claims, e.g., OHIP, Emergency Medicine, e.g., NACRS, Medication Claims, e.g., Ontario Drug Benefit Database)                       | EMR                      | Canadian Stroke Best Practice Recommendations, 2012-2013 (Lindsay et al., Canadian Heart and Stroke Foundation) |
| AFIB3                               | Percentage of time in therapeutic range (INR 2-3) among patients with atrial fibrillation on warfarin            | Number of patients in the denominator whose average INR test results was 2-3           | Number of primary healthcare patients age 20 and older with atrial fibrillation on warfarin with at least one INR test result | None       | Administrative Databases (Hospitalization, e.g., CIHI-DAD, Physician Claims, e.g., OHIP, Emergency Medicine, e.g., NACRS, Medication Claims, e.g., Ontario Drug Benefit Database, Laboratory Databases) | EMR                      | Canadian Stroke Best Practice Recommendations, 2012-2013 (Lindsay et al., Canadian Heart and Stroke Foundation) |
| <b>Access to Primary Care (N=2)</b> |                                                                                                                  |                                                                                        |                                                                                                                               |            |                                                                                                                                                                                                         |                          |                                                                                                                 |
| PC1                                 | Percentage of individuals who have visited a primary healthcare provider                                         | Number of patients in the denominator who have visited a primary healthcare provider   | Number of primary healthcare patients age 20 and older                                                                        | None       | Administrative Databases (Physician Services, e.g. OHIP)                                                                                                                                                |                          |                                                                                                                 |
| PC2                                 | Mean number of primary healthcare visits per year (e.g. for hypertension, diabetes, etc.)                        | Number of visits to primary healthcare providers per year                              | Number of primary healthcare patients age 20 and older                                                                        | None       | Administrative Databases (Physician Services, e.g. OHIP)                                                                                                                                                | EMR                      |                                                                                                                 |

| ID                              | Primary Prevention Indicator Topic Area                                                                                                   | Numerator                                                                                                      | Denominator                                                           | Exclusions | Preferred Data Source                                                                                                               | Alternate Data Source(s) | Relevant Clinical Guideline |
|---------------------------------|-------------------------------------------------------------------------------------------------------------------------------------------|----------------------------------------------------------------------------------------------------------------|-----------------------------------------------------------------------|------------|-------------------------------------------------------------------------------------------------------------------------------------|--------------------------|-----------------------------|
| <b>Outcome Indicators (N=5)</b> |                                                                                                                                           |                                                                                                                |                                                                       |            |                                                                                                                                     |                          |                             |
| O1                              | Acute myocardial infarction rate (per 1,000 person-years)                                                                                 | Number of hospitalizations for acute myocardial infarction among patients in the denominator                   | Person-years of follow-up among individuals 20 years of age and older | None       | Administrative Data (Hospitalization e.g., CIHI-DAD, other databases for denominator population, e.g. Registered Persons' Database) | N/A                      |                             |
| O2                              | Stroke (ischemic/hemorrhagic) rate (per 1,000 person-years)                                                                               | Number of hospitalizations for acute stroke (ischemic or hemorrhagic stroke) among patients in the denominator | Person-years of follow-up among individuals 20 years of age and older | None       | Administrative Data (Hospitalization e.g., CIHI-DAD, other databases for denominator population, e.g. Registered Persons' Database) | N/A                      |                             |
| O3                              | Congestive heart failure (requiring hospitalization) rate (per 1,000-person-years)                                                        | Number of hospitalizations for heart failure among patients in the denominator                                 | Person-years of follow-up among individuals 20 years of age and older | None       | Administrative Data (Hospitalization e.g., CIHI-DAD, other databases for denominator population, e.g. Registered Persons' Database) | N/A                      |                             |
| O4                              | Revascularization (percutaneous coronary intervention (PCI) or coronary artery bypass graft surgery (CABG)) rate (per 1,000 person-years) | Number of revascularization procedures performed among patients in the denominator                             | Person-years of follow-up among individuals 20 years of age and older | None       | Administrative Data (Hospitalization e.g., CIHI-DAD, other databases for denominator population, e.g. Registered Persons' Database) | N/A                      |                             |

| ID | Primary Prevention Indicator Topic Area                                 | Numerator                                                     | Denominator                                                           | Exclusions | Preferred Data Source                                                                                                                                                             | Alternate Data Source(s) | Relevant Clinical Guideline |
|----|-------------------------------------------------------------------------|---------------------------------------------------------------|-----------------------------------------------------------------------|------------|-----------------------------------------------------------------------------------------------------------------------------------------------------------------------------------|--------------------------|-----------------------------|
| O5 | Cardiovascular and/or all-cause mortality rate (per 1,000 person-years) | Number of deaths/cardiac deaths among patients in denominator | Person-years of follow-up among individuals 20 years of age and older | None       | Administrative Databases (Cause of Death Databases, e.g. Ontario Registrar General Death Database, other databases for denominator population, e.g. Registered Persons' Database) | N/A                      |                             |
